# Supplementary material
Source: publisher figshare collection journal article supplement (https://acs.figshare.com/ndownloader/files/4669465)
Supplement: Supplementary file 1 [file 4669465]

#\#CIF_1.1
 
#  CIF produced by WinGX routine CIF_UPDATE
#  Created on 2006-10-01 at 14:21:06
#  Using CIFtbx version 2.6.2 16 Jun 1998
 
#  Dictionary name : cif_core.dic
#  Dictionary vers : 2.3
#  Request file    : c:\wingx\files\archive.dat
#  CIF files read  : kncal11_m
 
#
#     CCDC ELECTRONIC DATA DEPOSITION FORM (CIF)
#
#     This electronic data deposition form can be used:
#
#     (a) WHEN SUBMITTING A PAPER TO A JOURNAL FOR PUBLICATION or
#     (b) WHEN SUBMITTING A PRIVATE COMMUNICATION TO THE CCDC
#
#     A comprehensive archive of CIF resources is maintained by the IUCr
#     at its Chester office. This can be accessed
#     by anonymous ftp to ftp.iucr.org
#     or via the WWW at http://www.iucr.org/cif/home.html
#     If data items in this form are not available or not applicable
#     then ignore these items
#     A few items specific to CCDC input are indicated by _ccdc_
#
#     Submission and help information is provided at the end of this form
#-------------------------------------------------------------------------
#1    Global data block identification for start of deposition
 
data_global
 
#
#-------------------------------------------------------------------------
#2    Person making the deposition
#
_publ_contact_author               'Farrugia, Louis J.'
_publ_contact_author_email          louis@chem.gla.ac.uk
 
#-------------------------------------------------------------------------
#3    Publication details
#
#     Provide these details if the structure has been published,
#     accepted or submitted for publication
#
#     The CCDC journal deposition number, eg. 182/357,
#     should be included only if it has been assigned by the journal
#
loop_
_publ_author_name
 
'Farrugia, Louis J.'
 
_journal_name_full                 'private communication'
_journal_volume                    ?
_journal_page_first                ?
_journal_page_last                 ?
_journal_year                      ?
_ccdc_journal_depnumber            ?
#
#-------------------------------------------------------------------------
#4    Chemical and physical data
#
#     Note that the units for melting point are Kelvin
#     The compound_id is the identifier for the compound in the published
#       paper, eg. 4a, II, etc.
#     Provide a brief description of any significant biological activity,
#       eg. antimalarial activity
#     If the compound exhibits polymorphism provide brief details,
#       eg. monoclinic form, low-temperature phase, etc.
#     For chemdiag  leave blank - no longer necessary
 
_ccdc_compound_id                  ?
_ccdc_biological_activity          ?
_ccdc_polymorph                    ?
 
_ccdc_chemdiag_type                ?
_ccdc_chemdiag_records
;
?
;
#
#-------------------------------------------------------------------------
#5    Other data relating to the structure determination and refinement
#
#     Record the radiation type if not X-rays, eg. neutron
#     Record the temperature of the data collection (Kelvin)
#       if not room-temperature
#     Record R_squared if this is the only reliability factor given by
#       your refinement program
#     Describe briefly any disorder, eg. t-Butyl C31-33 disordered over
#       two sites with occupancies 0.6 and 0.4
#     Under ccdc_comments record any other important information
 
_ccdc_temp_data_collection          ?
_ccdc_ls_R_squared                  ?
_ccdc_disorder                      ?
_ccdc_comments
;
?
;
#-------------------------------------------------------------------------
#6    Include your "standard" CIF file here
#     It should contain the following data items:
#       unit cell parameters and volume, z value, space group symbol,
#       R-factor(s), atomic coordinates with standard deviations,
#       occupancy factors, bond lengths and bond angles
#     Other data items may be present but will not necessarily be
#       included in the Cambridge Structural Database
#
#     Do NOT include structure factors
#
#
#-------------------------------------------------------------------------
#SUBMISSION INFORMATION
#
#     For a journal send the form to the address specified by the journal
#
#     For a private communication to the CCDC send the form to the address
#       deposit@ccdc.cam.ac.uk
#
#     For up-to-date information on deposition procedures, check the website
#       http://www.ccdc.cam.ac.uk/
 
data_kncal11_m
 
_audit_creation_date                    2006-10-01T14:21:06-00:00
_audit_creation_method                  'WinGX routine CIF_UPDATE'
 
#----------------------------------------------------------------------------#
#                   CHEMICAL INFORMATION                                     #
#----------------------------------------------------------------------------#
 
_chemical_name_systematic
;
 ?
;
_chemical_formula_sum                   'C44 H30 F2'
_chemical_formula_weight                596.68
 
#----------------------------------------------------------------------------#
#                   UNIT CELL INFORMATION                                    #
#----------------------------------------------------------------------------#
 
loop_
    _space_group_symop_operation_xyz
'x, y, z'
'-x, -y, -z'
 
_cell_length_a                          11.297(2)
_cell_length_b                          11.788(2)
_cell_length_c                          13.350(3)
_cell_angle_alpha                       71.565(3)
_cell_angle_beta                        85.639(4)
_cell_angle_gamma                       69.700(3)
_cell_volume                            1580.8(5)
_cell_formula_units_Z                   2
_cell_measurement_temperature           293(2)
 
#----------------------------------------------------------------------------#
#                   CRYSTAL INFORMATION                                      #
#----------------------------------------------------------------------------#
 
_exptl_crystal_density_diffrn           1.254
_exptl_crystal_density_method           'not measured'
_exptl_crystal_F_000                    624
_exptl_special_details
;
 ?
;
 
#----------------------------------------------------------------------------#
#                   ABSORPTION CORRECTION                                    #
#----------------------------------------------------------------------------#
 
_exptl_absorpt_coefficient_mu           0.079
_exptl_absorpt_correction_type          none
 
#----------------------------------------------------------------------------#
#                   DATA COLLECTION                                          #
#----------------------------------------------------------------------------#
 
_diffrn_ambient_temperature             293(2)
_diffrn_radiation_wavelength            0.71073
_diffrn_radiation_type                  MoK\a
_diffrn_radiation_monochromator         graphite
_diffrn_reflns_av_R_equivalents         0.0262
_diffrn_reflns_av_unetI/netI            0.0452
_diffrn_reflns_number                   11818
_diffrn_reflns_limit_h_min              -13
_diffrn_reflns_limit_h_max              13
_diffrn_reflns_limit_k_min              -13
_diffrn_reflns_limit_k_max              14
_diffrn_reflns_limit_l_min              -14
_diffrn_reflns_limit_l_max              16
_diffrn_reflns_theta_min                1.61
_diffrn_reflns_theta_max                25.35
_diffrn_reflns_theta_full               25.35
_diffrn_measured_fraction_theta_full
                                        0.989
_diffrn_measured_fraction_theta_max
                                        0.989
_reflns_number_total                    5716
_reflns_number_gt                       4136
_reflns_threshold_expression            >2sigma(I)
 
#----------------------------------------------------------------------------#
#                   COMPUTER PROGRAMS USED                                   #
#----------------------------------------------------------------------------#
 
_computing_structure_refinement         'SHELXL-97 (Sheldrick, 1997)'
 
#----------------------------------------------------------------------------#
#                   REFINEMENT INFORMATION                                   #
#----------------------------------------------------------------------------#
 
_refine_special_details
;
 Refinement of F^2^ against ALL reflections.  The weighted R-factor wR and
 goodness of fit S are based on F^2^, conventional R-factors R are based
 on F, with F set to zero for negative F^2^. The threshold expression of
 F^2^ > 2sigma(F^2^) is used only for calculating R-factors(gt) etc. and is
 not relevant to the choice of reflections for refinement.  R-factors based
 on F^2^ are statistically about twice as large as those based on F, and R-
 factors based on ALL data will be even larger.
;
_refine_ls_structure_factor_coef        Fsqd
_refine_ls_matrix_type                  full
_refine_ls_weighting_scheme             calc
_refine_ls_weighting_details
         'calc w=1/[\s^2^(Fo^2^)+(0.0529P)^2^+0.2814P] where P=(Fo^2^+2Fc^2^)/3'
_atom_sites_solution_primary            direct
_atom_sites_solution_secondary          difmap
_atom_sites_solution_hydrogens          geom
_refine_ls_hydrogen_treatment           mixed
_refine_ls_extinction_method            none
_refine_ls_number_reflns                5716
_refine_ls_number_parameters            415
_refine_ls_number_restraints            0
_refine_ls_R_factor_all                 0.0999
_refine_ls_R_factor_gt                  0.068
_refine_ls_wR_factor_ref                0.1445
_refine_ls_wR_factor_gt                 0.1323
_refine_ls_goodness_of_fit_ref          1.163
_refine_ls_restrained_S_all             1.163
_refine_ls_shift/su_max                 0
_refine_ls_shift/su_mean                0
_refine_diff_density_max                0.176
_refine_diff_density_min                -0.157
_refine_diff_density_rms                0.033
 
#----------------------------------------------------------------------------#
#                   ATOMIC TYPES, COORDINATES AND THERMAL PARAMETERS         #
#----------------------------------------------------------------------------#
 
loop_
    _atom_type_symbol
    _atom_type_description
    _atom_type_scat_dispersion_real
    _atom_type_scat_dispersion_imag
    _atom_type_scat_source
C C 0.0033 0.0016 'International Tables Vol C Tables 4.2.6.8 and 6.1.1.4'
H H 0 0 'International Tables Vol C Tables 4.2.6.8 and 6.1.1.4'
F F 0.0171 0.0103 'International Tables Vol C Tables 4.2.6.8 and 6.1.1.4'
 
loop_
    _atom_site_label
    _atom_site_type_symbol
    _atom_site_fract_x
    _atom_site_fract_y
    _atom_site_fract_z
    _atom_site_U_iso_or_equiv
    _atom_site_adp_type
    _atom_site_occupancy
    _atom_site_symmetry_multiplicity
    _atom_site_calc_flag
    _atom_site_refinement_flags
    _atom_site_disorder_assembly
    _atom_site_disorder_group
F2 F 0.33256(13) 1.02138(13) 0.37714(11) 0.0528(4) Uani 1 1 d . . .
F1 F 0.22434(13) 0.89718(14) 0.44293(11) 0.0554(4) Uani 1 1 d . . .
C27 C -0.1456(2) 1.0216(2) 0.23196(19) 0.0377(6) Uani 1 1 d . . .
C1 C 0.2851(2) 0.9411(2) 0.35344(19) 0.0411(6) Uani 1 1 d . . .
C21 C 0.0618(2) 0.7759(2) 0.19447(19) 0.0399(6) Uani 1 1 d . . .
C15 C 0.3842(2) 0.6784(2) 0.2287(2) 0.0413(6) Uani 1 1 d . . .
C8 C 0.2039(2) 0.8848(2) 0.23121(18) 0.0363(5) Uani 1 1 d . . .
C39 C 0.2404(2) 1.0971(2) 0.16999(19) 0.0393(6) Uani 1 1 d . . .
C6 C 0.0498(2) 1.0617(2) 0.26638(18) 0.0378(6) Uani 1 1 d . . .
C4 C 0.0890(2) 0.8817(2) 0.21389(18) 0.0375(6) Uani 1 1 d . . .
C3 C 0.3315(2) 0.7940(2) 0.26154(18) 0.0376(6) Uani 1 1 d . . .
C5 C -0.0063(2) 0.9944(2) 0.23391(18) 0.0383(6) Uani 1 1 d . . .
C9 C 0.5147(2) 0.7805(2) 0.3718(2) 0.0427(6) Uani 1 1 d . . .
C40 C 0.2271(2) 1.2163(2) 0.1763(2) 0.0504(7) Uani 1 1 d . . .
H40 H 0.188 1.2402 0.234 0.06 Uiso 1 1 calc R . .
C7 C 0.1919(2) 1.0040(2) 0.25663(18) 0.0370(6) Uani 1 1 d . . .
C22 C 0.0952(2) 0.6569(2) 0.2693(2) 0.0513(7) Uani 1 1 d . . .
H22 H 0.1319 0.644 0.3338 0.062 Uiso 1 1 calc R . .
C2 C 0.3846(2) 0.8307(2) 0.32815(18) 0.0382(6) Uani 1 1 d . . .
C33 C -0.0159(2) 1.1759(2) 0.2989(2) 0.0468(6) Uani 1 1 d . . .
C20 C 0.3543(2) 0.6811(3) 0.1289(2) 0.0514(7) Uani 1 1 d . . .
H20 H 0.3042 0.7574 0.0821 0.062 Uiso 1 1 calc R . .
C28 C -0.2095(2) 1.0151(3) 0.3240(2) 0.0512(7) Uani 1 1 d . . .
H28 H -0.165 0.9915 0.3874 0.061 Uiso 1 1 calc R . .
C30 C -0.4061(2) 1.0800(3) 0.2323(2) 0.0568(7) Uani 1 1 d . . .
H30 H -0.4934 1.1004 0.2322 0.068 Uiso 1 1 calc R . .
C29 C -0.3390(2) 1.0430(3) 0.3243(2) 0.0586(8) Uani 1 1 d . . .
H29 H -0.3803 1.0365 0.3877 0.07 Uiso 1 1 calc R . .
C26 C 0.0081(2) 0.7915(3) 0.0988(2) 0.0549(7) Uani 1 1 d . . .
H26 H -0.0154 0.8708 0.0474 0.066 Uiso 1 1 calc R . .
C32 C -0.2150(2) 1.0571(3) 0.1399(2) 0.0580(8) Uani 1 1 d . . .
H32 H -0.1742 1.0612 0.0764 0.07 Uiso 1 1 calc R . .
C44 C 0.2992(2) 1.0661(3) 0.0827(2) 0.0511(7) Uani 1 1 d . . .
H44 H 0.3095 0.987 0.0763 0.061 Uiso 1 1 calc R . .
C14 C 0.6165(2) 0.7528(2) 0.3079(2) 0.0531(7) Uani 1 1 d . . .
H14 H 0.6021 0.7625 0.2375 0.064 Uiso 1 1 calc R . .
C23 C 0.0746(3) 0.5575(3) 0.2494(3) 0.0666(8) Uani 1 1 d . . .
H23 H 0.0968 0.4781 0.3006 0.08 Uiso 1 1 calc R . .
C41 C 0.2709(2) 1.3000(3) 0.0984(3) 0.0619(8) Uani 1 1 d . . .
H41 H 0.2612 1.3793 0.1042 0.074 Uiso 1 1 calc R . .
C16 C 0.4590(2) 0.5626(2) 0.2967(2) 0.0574(7) Uani 1 1 d . . .
H16 H 0.4801 0.5576 0.3643 0.069 Uiso 1 1 calc R . .
C43 C 0.3429(3) 1.1493(3) 0.0055(2) 0.0651(8) Uani 1 1 d . . .
H43 H 0.3825 1.1257 -0.0521 0.078 Uiso 1 1 calc R . .
C38 C 0.0081(3) 1.1782(3) 0.3979(3) 0.0658(8) Uani 1 1 d . . .
H38 H 0.0714 1.1101 0.4416 0.079 Uiso 1 1 calc R . .
C31 C -0.3443(2) 1.0867(3) 0.1406(2) 0.0649(8) Uani 1 1 d . . .
H31 H -0.3896 1.1116 0.0774 0.078 Uiso 1 1 calc R . .
C42 C 0.3286(3) 1.2666(3) 0.0126(3) 0.0675(9) Uani 1 1 d . . .
H42 H 0.3576 1.3231 -0.0401 0.081 Uiso 1 1 calc R . .
C34 C -0.1085(3) 1.2798(3) 0.2344(3) 0.0693(9) Uani 1 1 d . . .
H34 H -0.1263 1.2812 0.1671 0.083 Uiso 1 1 calc R . .
C10 C 0.5392(3) 0.7668(3) 0.4755(2) 0.0690(9) Uani 1 1 d . . .
H10 H 0.4726 0.7868 0.5196 0.083 Uiso 1 1 calc R . .
C17 C 0.5021(3) 0.4550(3) 0.2650(3) 0.0739(10) Uani 1 1 d . . .
H17 H 0.5523 0.3782 0.3111 0.089 Uiso 1 1 calc R . .
C13 C 0.7383(3) 0.7115(3) 0.3470(3) 0.0741(10) Uani 1 1 d . . .
H13 H 0.8056 0.6946 0.3029 0.089 Uiso 1 1 calc R . .
C25 C -0.0109(3) 0.6917(3) 0.0789(3) 0.0688(9) Uani 1 1 d . . .
H25 H -0.046 0.7035 0.014 0.083 Uiso 1 1 calc R . .
C24 C 0.0214(3) 0.5754(3) 0.1538(3) 0.0734(10) Uani 1 1 d . . .
H24 H 0.0075 0.5082 0.1404 0.088 Uiso 1 1 calc R . .
C19 C 0.3968(3) 0.5738(3) 0.0975(3) 0.0700(9) Uani 1 1 d . . .
H19 H 0.3751 0.5777 0.0304 0.084 Uiso 1 1 calc R . .
C12 C 0.7604(3) 0.6951(3) 0.4508(4) 0.0899(12) Uani 1 1 d . . .
H12 H 0.8429 0.6645 0.478 0.108 Uiso 1 1 calc R . .
C18 C 0.4713(3) 0.4611(3) 0.1657(3) 0.0778(10) Uani 1 1 d . . .
H18 H 0.5011 0.3885 0.1445 0.093 Uiso 1 1 calc R . .
C37 C -0.0592(4) 1.2785(4) 0.4331(3) 0.0914(12) Uani 1 1 d . . .
H37 H -0.0422 1.2773 0.5006 0.11 Uiso 1 1 calc R . .
C11 C 0.6624(4) 0.7234(4) 0.5139(3) 0.0931(12) Uani 1 1 d . . .
H11 H 0.678 0.7136 0.5841 0.112 Uiso 1 1 calc R . .
C36 C -0.1503(4) 1.3796(4) 0.3704(5) 0.1071(16) Uani 1 1 d . . .
H36 H -0.1964 1.4472 0.3949 0.129 Uiso 1 1 calc R . .
C35 C -0.1745(3) 1.3819(3) 0.2704(4) 0.0950(13) Uani 1 1 d . . .
H35 H -0.2355 1.4524 0.2265 0.114 Uiso 1 1 calc R . .
 
loop_
    _atom_site_aniso_label
    _atom_site_aniso_U_11
    _atom_site_aniso_U_22
    _atom_site_aniso_U_33
    _atom_site_aniso_U_23
    _atom_site_aniso_U_13
    _atom_site_aniso_U_12
F2 0.0469(8) 0.0577(9) 0.0612(10) -0.0292(8) -0.0081(7) -0.0148(7)
F1 0.0489(9) 0.0667(10) 0.0442(9) -0.0156(7) 0.0087(7) -0.0150(7)
C27 0.0316(12) 0.0359(13) 0.0451(15) -0.0125(11) 0.0006(11) -0.0106(10)
C1 0.0364(13) 0.0467(14) 0.0434(15) -0.0172(12) 0.0023(11) -0.0153(11)
C21 0.0266(12) 0.0430(14) 0.0531(16) -0.0203(12) 0.0042(11) -0.0113(11)
C15 0.0288(12) 0.0406(14) 0.0561(16) -0.0167(12) 0.0070(11) -0.0134(11)
C8 0.0304(12) 0.0409(13) 0.0388(14) -0.0152(11) 0.0007(10) -0.0109(10)
C39 0.0301(12) 0.0437(14) 0.0441(14) -0.0129(11) -0.0037(11) -0.0119(10)
C6 0.0300(12) 0.0386(13) 0.0425(14) -0.0126(11) -0.0004(10) -0.0086(10)
C4 0.0346(13) 0.0408(13) 0.0353(13) -0.0113(11) -0.0001(10) -0.0107(11)
C3 0.0312(12) 0.0376(13) 0.0408(14) -0.0106(11) 0.0034(10) -0.0098(10)
C5 0.0317(12) 0.0403(13) 0.0400(14) -0.0114(11) 0.0000(10) -0.0092(11)
C9 0.0386(14) 0.0368(13) 0.0478(16) -0.0084(11) -0.0070(12) -0.0093(11)
C40 0.0363(14) 0.0518(16) 0.0674(18) -0.0218(14) -0.0011(13) -0.0168(12)
C7 0.0292(12) 0.0395(13) 0.0438(14) -0.0168(11) -0.0009(10) -0.0098(10)
C22 0.0487(15) 0.0491(16) 0.0565(17) -0.0162(14) 0.0030(13) -0.0175(13)
C2 0.0319(12) 0.0421(13) 0.0361(13) -0.0082(11) -0.0004(10) -0.0105(11)
C33 0.0290(13) 0.0461(15) 0.0690(19) -0.0223(14) 0.0081(12) -0.0146(11)
C20 0.0433(15) 0.0530(16) 0.0634(19) -0.0283(14) 0.0092(13) -0.0152(13)
C28 0.0431(15) 0.0653(18) 0.0446(16) -0.0181(13) -0.0012(12) -0.0159(13)
C30 0.0301(13) 0.0614(18) 0.078(2) -0.0224(16) 0.0033(14) -0.0137(13)
C29 0.0431(16) 0.0719(19) 0.0595(19) -0.0220(15) 0.0167(14) -0.0199(14)
C26 0.0483(16) 0.0566(17) 0.0640(18) -0.0231(14) -0.0091(14) -0.0166(13)
C32 0.0356(14) 0.086(2) 0.0461(16) -0.0173(15) 0.0018(12) -0.0166(14)
C44 0.0532(16) 0.0516(16) 0.0481(16) -0.0136(13) 0.0010(13) -0.0189(13)
C14 0.0348(14) 0.0507(16) 0.0707(19) -0.0198(14) 0.0031(13) -0.0102(12)
C23 0.0637(19) 0.0423(16) 0.090(2) -0.0159(16) 0.0072(18) -0.0189(14)
C41 0.0422(16) 0.0487(16) 0.094(2) -0.0123(17) -0.0042(16) -0.0219(13)
C16 0.0460(15) 0.0446(16) 0.077(2) -0.0162(15) -0.0015(14) -0.0122(13)
C43 0.0650(19) 0.074(2) 0.0512(18) -0.0101(16) 0.0076(15) -0.0270(17)
C38 0.0585(18) 0.068(2) 0.082(2) -0.0443(18) 0.0092(16) -0.0167(15)
C31 0.0336(15) 0.095(2) 0.0591(19) -0.0208(17) -0.0063(14) -0.0143(15)
C42 0.0517(18) 0.069(2) 0.070(2) 0.0045(17) -0.0001(16) -0.0288(16)
C34 0.0412(16) 0.0485(17) 0.111(3) -0.0228(17) -0.0012(16) -0.0077(14)
C10 0.0538(18) 0.085(2) 0.059(2) -0.0195(17) -0.0132(15) -0.0117(16)
C17 0.0549(19) 0.0403(17) 0.115(3) -0.0182(18) 0.0047(19) -0.0079(14)
C13 0.0374(17) 0.0598(19) 0.121(3) -0.030(2) 0.0022(18) -0.0101(14)
C25 0.0586(19) 0.076(2) 0.088(2) -0.045(2) -0.0112(17) -0.0223(17)
C24 0.0531(18) 0.066(2) 0.124(3) -0.053(2) 0.0088(19) -0.0271(16)
C19 0.067(2) 0.080(2) 0.084(2) -0.050(2) 0.0220(18) -0.0321(18)
C12 0.045(2) 0.077(2) 0.140(4) -0.028(2) -0.035(2) -0.0078(17)
C18 0.067(2) 0.061(2) 0.124(3) -0.055(2) 0.030(2) -0.0261(18)
C37 0.084(3) 0.098(3) 0.128(3) -0.080(3) 0.040(2) -0.042(2)
C11 0.075(2) 0.103(3) 0.088(3) -0.024(2) -0.043(2) -0.010(2)
C36 0.077(3) 0.075(3) 0.200(5) -0.086(3) 0.055(3) -0.033(2)
C35 0.051(2) 0.047(2) 0.173(4) -0.032(2) 0.009(2) -0.0032(15)
 
 
#----------------------------------------------------------------------------#
#                   MOLECULAR GEOMETRY                                       #
#----------------------------------------------------------------------------#
 
_geom_special_details
;
 All esds (except the esd in the dihedral angle between two l.s. planes)
 are estimated using the full covariance matrix.  The cell esds are taken
 into account individually in the estimation of esds in distances, angles
 and torsion angles; correlations between esds in cell parameters are only
 used when they are defined by crystal symmetry.  An approximate (isotropic)
 treatment of cell esds is used for estimating esds involving l.s. planes.
;
loop_
    _geom_bond_atom_site_label_1
    _geom_bond_atom_site_label_2
    _geom_bond_distance
    _geom_bond_site_symmetry_2
    _geom_bond_publ_flag
F2 C1 1.360(3) . ?
F1 C1 1.378(3) . ?
C27 C28 1.372(3) . ?
C27 C32 1.376(3) . ?
C27 C5 1.493(3) . ?
C1 C2 1.508(3) . ?
C1 C7 1.546(3) . ?
C21 C22 1.382(3) . ?
C21 C26 1.387(3) . ?
C21 C4 1.482(3) . ?
C15 C20 1.387(3) . ?
C15 C16 1.390(3) . ?
C15 C3 1.476(3) . ?
C8 C4 1.351(3) . ?
C8 C3 1.461(3) . ?
C8 C7 1.507(3) . ?
C39 C44 1.384(3) . ?
C39 C40 1.389(3) . ?
C39 C7 1.536(3) . ?
C6 C5 1.352(3) . ?
C6 C33 1.477(3) . ?
C6 C7 1.524(3) . ?
C4 C5 1.479(3) . ?
C3 C2 1.357(3) . ?
C9 C10 1.381(4) . ?
C9 C14 1.387(3) . ?
C9 C2 1.469(3) . ?
C40 C41 1.382(4) . ?
C22 C23 1.376(4) . ?
C33 C38 1.379(4) . ?
C33 C34 1.384(4) . ?
C20 C19 1.374(4) . ?
C28 C29 1.383(4) . ?
C30 C31 1.357(4) . ?
C30 C29 1.359(4) . ?
C26 C25 1.373(4) . ?
C32 C31 1.378(3) . ?
C44 C43 1.374(4) . ?
C14 C13 1.372(4) . ?
C23 C24 1.375(4) . ?
C41 C42 1.374(4) . ?
C16 C17 1.380(4) . ?
C43 C42 1.368(4) . ?
C38 C37 1.369(4) . ?
C34 C35 1.388(4) . ?
C10 C11 1.382(4) . ?
C17 C18 1.369(5) . ?
C13 C12 1.368(5) . ?
C25 C24 1.361(4) . ?
C19 C18 1.371(5) . ?
C12 C11 1.352(5) . ?
C37 C36 1.353(6) . ?
C36 C35 1.372(6) . ?
 
loop_
    _geom_angle_atom_site_label_1
    _geom_angle_atom_site_label_2
    _geom_angle_atom_site_label_3
    _geom_angle
    _geom_angle_site_symmetry_1
    _geom_angle_site_symmetry_3
    _geom_angle_publ_flag
C28 C27 C32 117.6(2) . . ?
C28 C27 C5 119.9(2) . . ?
C32 C27 C5 122.5(2) . . ?
F2 C1 F1 104.33(18) . . ?
F2 C1 C2 113.80(19) . . ?
F1 C1 C2 109.96(19) . . ?
F2 C1 C7 114.44(19) . . ?
F1 C1 C7 110.01(18) . . ?
C2 C1 C7 104.36(18) . . ?
C22 C21 C26 118.0(2) . . ?
C22 C21 C4 120.9(2) . . ?
C26 C21 C4 121.1(2) . . ?
C20 C15 C16 117.6(2) . . ?
C20 C15 C3 120.1(2) . . ?
C16 C15 C3 122.2(2) . . ?
C4 C8 C3 137.5(2) . . ?
C4 C8 C7 110.85(19) . . ?
C3 C8 C7 108.84(19) . . ?
C44 C39 C40 117.2(2) . . ?
C44 C39 C7 121.7(2) . . ?
C40 C39 C7 121.1(2) . . ?
C5 C6 C33 125.8(2) . . ?
C5 C6 C7 108.0(2) . . ?
C33 C6 C7 126.1(2) . . ?
C8 C4 C5 107.3(2) . . ?
C8 C4 C21 126.6(2) . . ?
C5 C4 C21 125.5(2) . . ?
C2 C3 C8 108.4(2) . . ?
C2 C3 C15 128.3(2) . . ?
C8 C3 C15 123.2(2) . . ?
C6 C5 C4 110.8(2) . . ?
C6 C5 C27 124.2(2) . . ?
C4 C5 C27 124.6(2) . . ?
C10 C9 C14 118.1(2) . . ?
C10 C9 C2 121.1(2) . . ?
C14 C9 C2 120.7(2) . . ?
C41 C40 C39 121.1(3) . . ?
C8 C7 C6 102.30(18) . . ?
C8 C7 C39 113.44(19) . . ?
C6 C7 C39 110.58(18) . . ?
C8 C7 C1 97.66(17) . . ?
C6 C7 C1 122.5(2) . . ?
C39 C7 C1 109.47(18) . . ?
C23 C22 C21 120.8(3) . . ?
C3 C2 C9 129.9(2) . . ?
C3 C2 C1 108.34(19) . . ?
C9 C2 C1 121.7(2) . . ?
C38 C33 C34 118.2(3) . . ?
C38 C33 C6 120.3(2) . . ?
C34 C33 C6 121.3(3) . . ?
C19 C20 C15 121.6(3) . . ?
C27 C28 C29 121.2(2) . . ?
C31 C30 C29 119.2(2) . . ?
C30 C29 C28 120.3(3) . . ?
C25 C26 C21 121.0(3) . . ?
C27 C32 C31 120.9(3) . . ?
C43 C44 C39 121.6(3) . . ?
C13 C14 C9 121.0(3) . . ?
C24 C23 C22 120.0(3) . . ?
C42 C41 C40 120.4(3) . . ?
C17 C16 C15 120.7(3) . . ?
C42 C43 C44 120.5(3) . . ?
C37 C38 C33 121.4(3) . . ?
C30 C31 C32 120.8(3) . . ?
C43 C42 C41 119.2(3) . . ?
C33 C34 C35 119.8(3) . . ?
C9 C10 C11 120.1(3) . . ?
C18 C17 C16 120.2(3) . . ?
C12 C13 C14 119.9(3) . . ?
C24 C25 C26 120.2(3) . . ?
C25 C24 C23 120.0(3) . . ?
C18 C19 C20 119.6(3) . . ?
C11 C12 C13 119.9(3) . . ?
C19 C18 C17 120.2(3) . . ?
C36 C37 C38 120.4(4) . . ?
C12 C11 C10 120.9(3) . . ?
C37 C36 C35 119.7(4) . . ?
C36 C35 C34 120.4(4) . . ?
 
